# Supplementary material for: A glass fibre membrane platform for ultra-sensitive detection of cardiac troponin T
Source: Royal Society of Chemistry journal article supplement (doi:10.1039/c7an01389b), 2017-01-01
Supplement: c7an01389b1.pdf [file c7an01389b1.pdf]

## Supporting Information

**Table S1: Probes**

| Probes         | Description                       | Sequence                                                  |
|----------------|-----------------------------------|-----------------------------------------------------------|
| <b>Probe1</b>  | Control probe                     | 5'-GGGGGGGGG TTCCT AGT GGC TCT ATG GTA AC-3'              |
| <b>Probe2</b>  | Test probe                        | 5'-GGG GGG GGG CTT TAT CAT ATA CCT TGC GAG CGC GG-3'      |
| <b>Cy5-DNA</b> | Cy5 labelled control probe target | 3'-GGATCACCGAGATACCATTGGAGACTGCG-Cy5-5'                   |
| <b>cAB-DNA</b> | DNA conjugated to cAB             | 5'-NH <sub>2</sub> -TTT TTT TTT CCG CGC TCG CAA GGT AT-3' |

GGGGGGGGG – 9G for immobilization of the probes on the AMCA modified glass fibre membranes

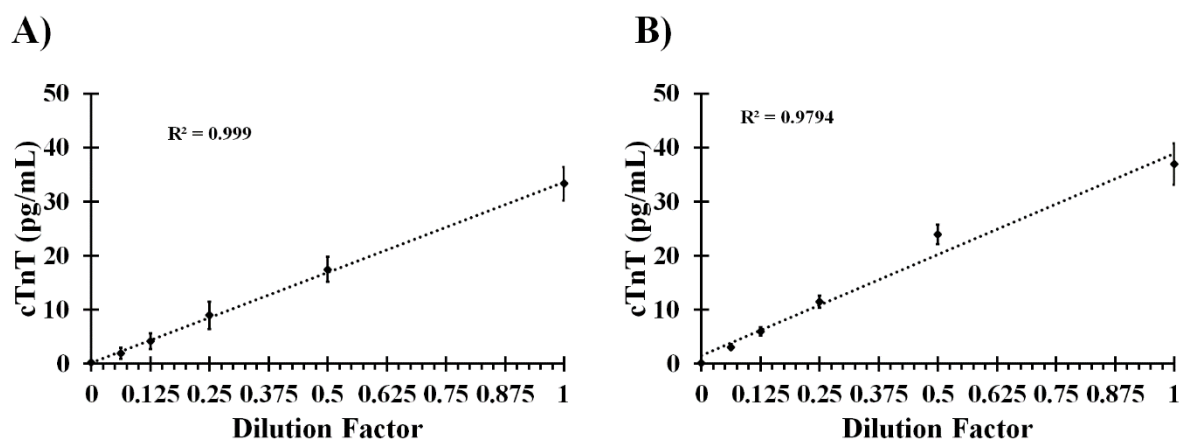

**Figure S1:** Linearity of test by dilution of spiked human serum samples A) 33.4pg/mL, B) 37.0pg/mL

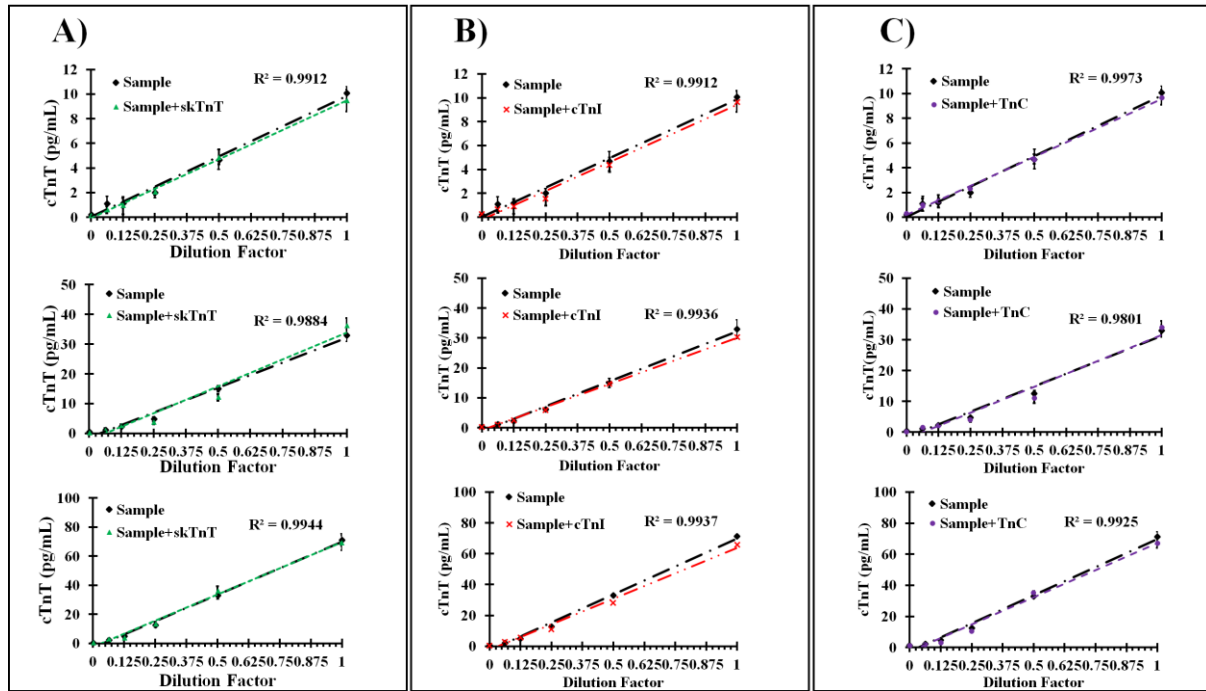

**Figure S2:** Determination of cross-reactivity of A) skTnT (1µg/mL), B) cTnI (1µg/mL), and cTnT (1µg/mL) (Plasma samples containing 10pg/mL, 30pg/mL, and 70pg/mL of native cTnT arranged from top to bottom, respectively)

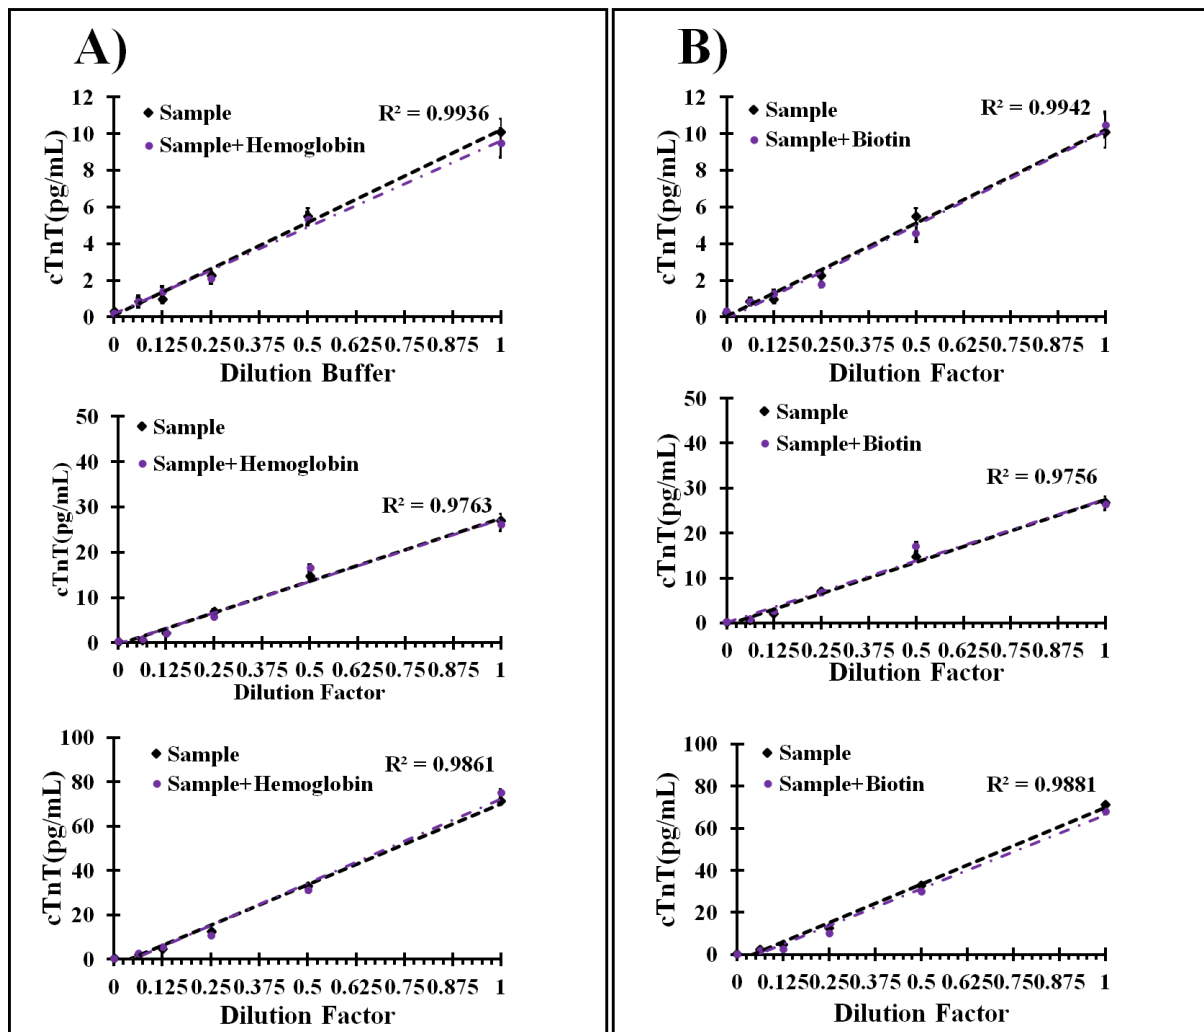

**Figure S3:** Determination of interference of A) hemoglobin (1μg/mL), B) biotin (1μg/mL) (Plasma samples containing 10pg/mL, 30pg/mL, and 70pg/mL of native cTnT arranged from top to bottom, respectively)
